# Supplementary material
Source: Springer Nature journal article supplement (https://www.springermedizin.de/resource/supplementary/13063_2005_125_MOESM6_ESM.pdf/9427538)

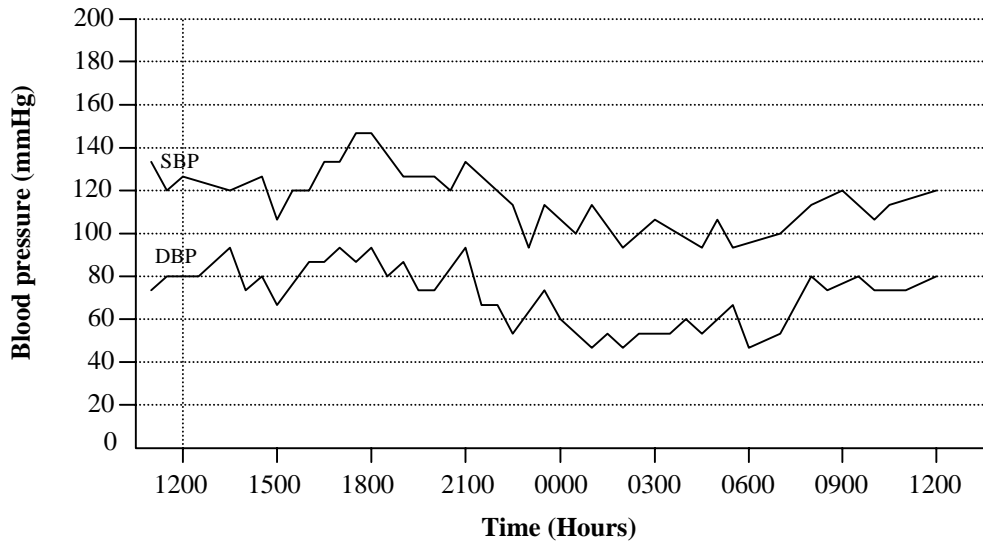

Supplement: MOESM6 [file 9427538]
